# Supplementary material for: A missense mutation in Large Grain Size 1 increases grain size and enhances cold tolerance in rice
Source: PubMed Central journal article supplement — J Exp Bot. 2019 Apr 25;70(15):3851–66. doi: 10.1093/jxb/erz192 (PMC6685659; doi:10.1093/jxb/erz192), 2019-04-25
Supplement: erz192_suppl_supplementary_figures_s1-s12_tables_s1-s7.pdf [file erz192_suppl_supplementary_figures_s1-s12_tables_s1-s7.pdf]

# A Missense Mutation in *LGSI* Increases Grain Size and Enhances Cold Tolerance in Rice

X. Chen, L. Jiang, J. Zheng, F. Chen, T. Wang, M. Wang, Y. Tao, H. Wang, Z. Hong, Y. Huang and R. Huang

## Supplementary Figures:

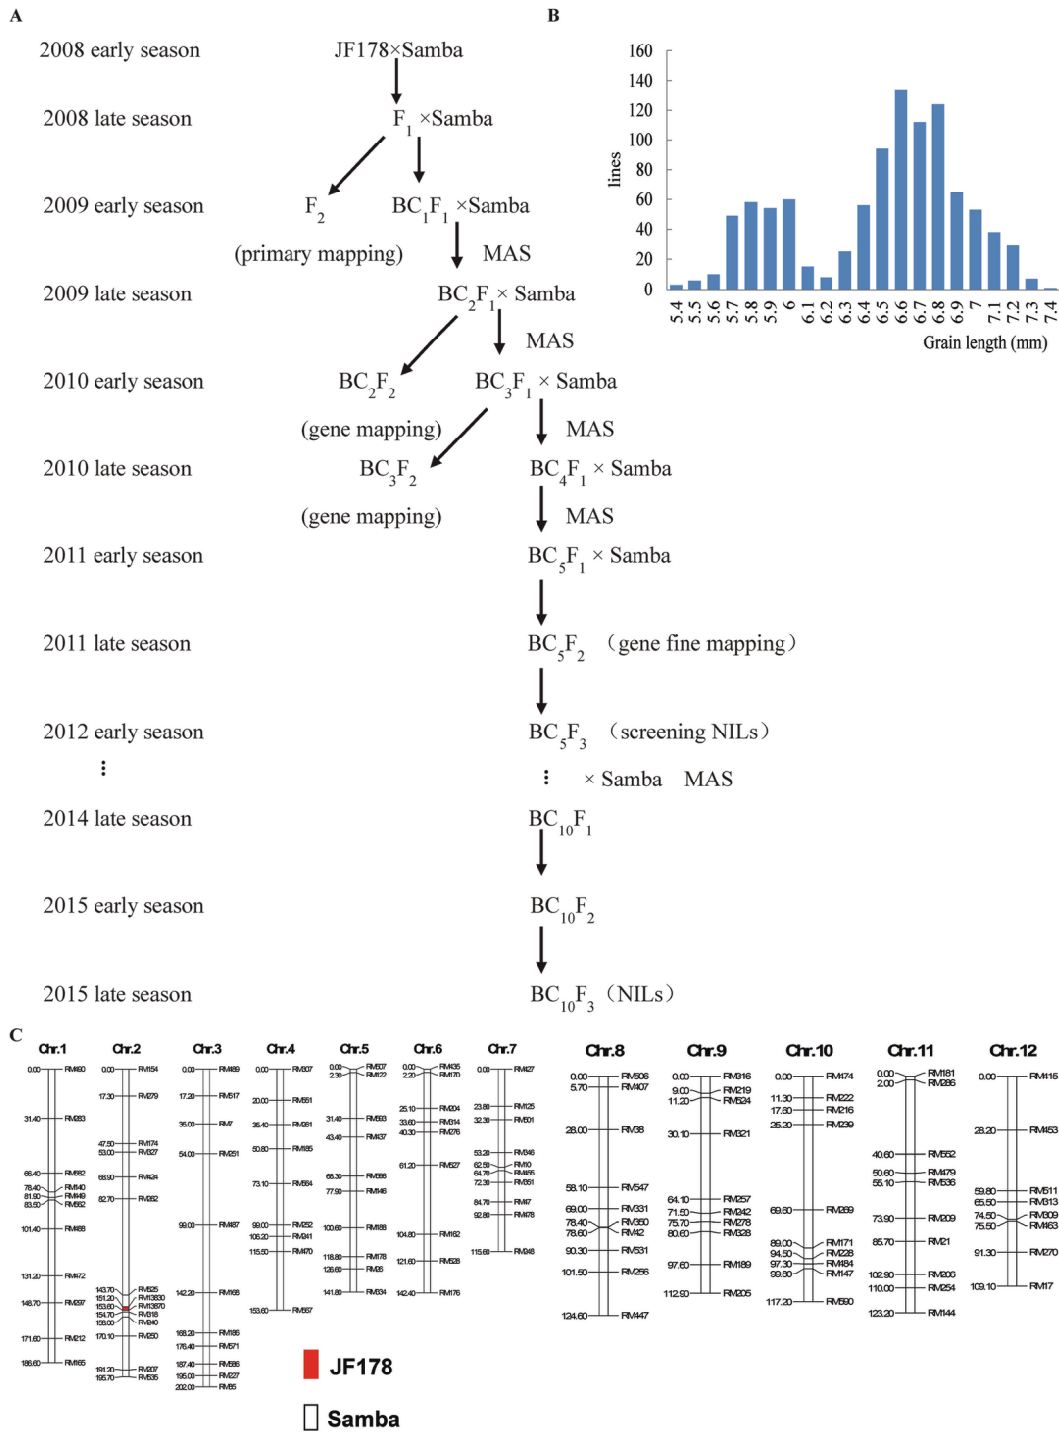

**Figure S1.** Construction of Near-isogenic line NIL-*LGSI*. (A) Procedure of selection for Near-isogenic line (NIL) and construction of advanced backcross populations and mapping populations. MAS, molecular marker-assisted selection. BC<sub>10</sub>F<sub>3</sub> materials were analyzed in this study. (B) Distribution of grain length in the BC<sub>5</sub>F<sub>2</sub> population. (C) Background of NIL and Samba. The RM, SSR primers were from from International Rice Genome Sequencing Project (Matsumoto *et al.*, 2005). The red bar indicates the JF178 background, and the white bar indicates the Samba background in the rice genome. (Matsumoto T, Wu JZ, Kanamori H, et al. 2005. The map-based sequence of the rice genome. Nature **436**, 793-800.)

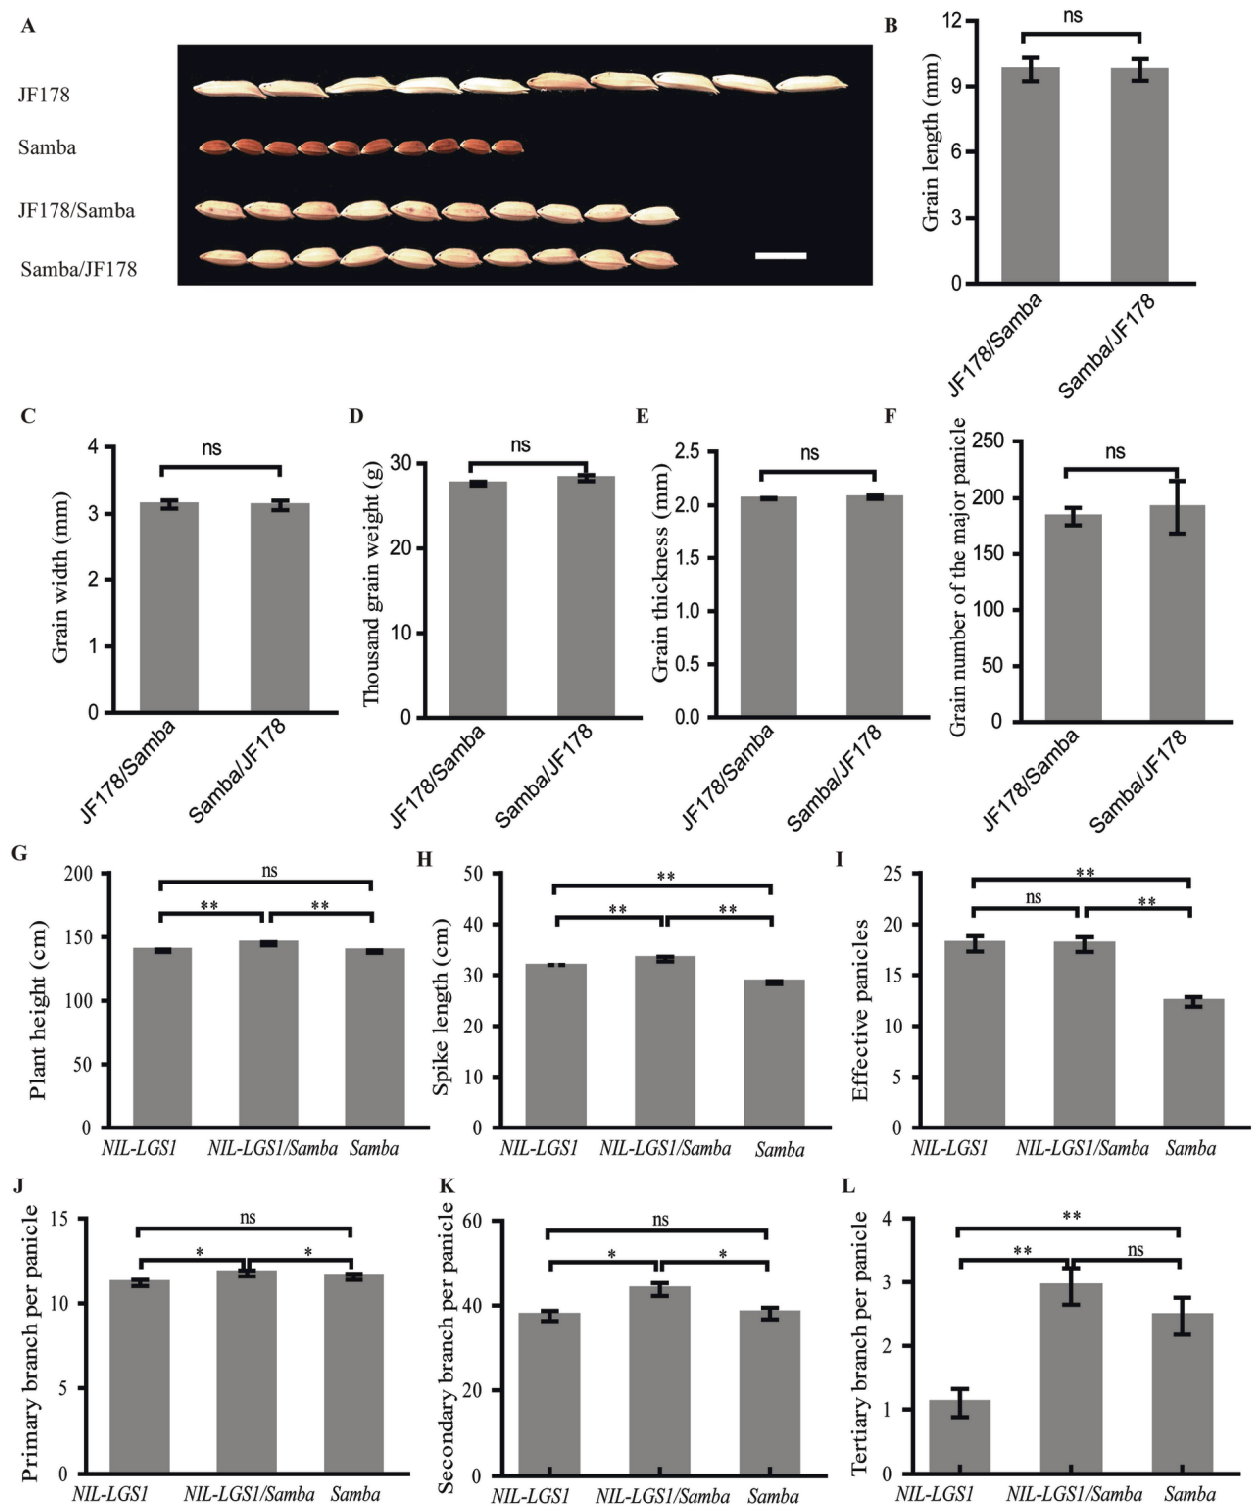

**Figure S2.** Panicle phenotype analysis of *LGS1* plants. (A) Grain phenotype of parental lines and reciprocal crossing  $F_1$  generations. Scale bar, 1 cm. (B-F) Comparison of grain length (B), grain width (C), thousand grain weight (D), grain thickness (E) and grain number of the major panicle (F) of reciprocal crossing  $F_1$  progeny between JF178 and Samba ( $n \sim 100-3000$ ). (G-I) Comparison of plant height (G), spike length (H), effective panicles (I), primary branch per panicle (J), secondary branch per panicle (K) and tertiary branch per panicle (L) in NILs ( $n=90$ ). Values are given as the mean  $\pm$  SE. ns  $P > 0.05$ , \*  $P < 0.05$ , \*\*  $P < 0.01$  were calculated by Student's *t*-test.

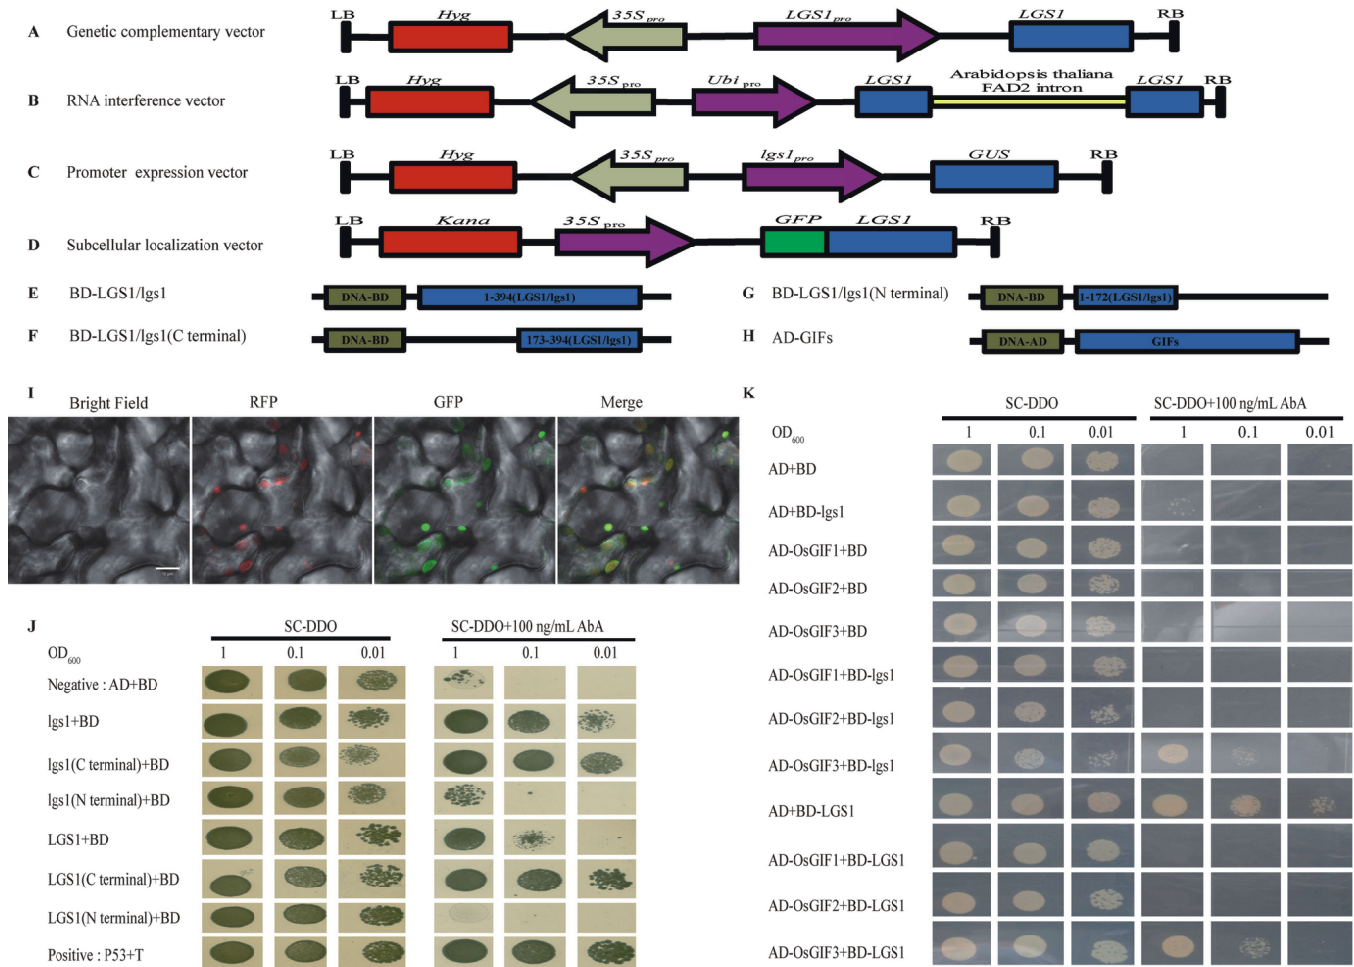

**Figure S3.** LGS1 expression vector constructs, subcellular localization and interaction partner. (A-D) Schematic diagrams of genetic complementation vector (A), RNA interference vector (B), *lgs1* promoter::GUS reporter vector (C), subcellular localization vector of LGS1 (D). (E-H) vectors expressing the full-length LGS1 (E), the LGS1 C-terminus (F), the LGS1 N-terminus (G), and GIFs (H). These cDNAs were fused to the GAL4 DNA-binding domain in pGBKT7, or to the GAL4 DNA-activating domain in pGAKT7. (I) Subcellular localization of LGS1. The LGS1-green fluorescent protein (GFP) fusion protein was localized to the nucleus. Bright field, *Arabidopsis* cells imaged on bright field; GFP, *Arabidopsis* cells expressing LGS1-GFP; RFP, *Arabidopsis* cells expressing the nuclear localization marker Collin-RFP; Merge, merged image of GFP and RFP. (J) Transcriptional activity of the LGS1 C-terminus. (K) Interaction between LGS1 and GIFs. Full-length LGS1 includes amino acid residues 1-394 (LGS1<sup>JF178</sup>, *lgs1*<sup>Ma85</sup>). The LGS1 C-terminus contains residues between 173-394, and the N-terminus has amino acid residues between 1-172. The *LGS1* cDNA was cloned from JF178, whereas the *lgs1* cDNA was from Ma85. Full-length cDNAs of *OsGIF1* (Os11g0615200), *OsGIF2* (Os12g0496900), and *OsGIF3* (Os03g0733600) were cloned from Ma85.

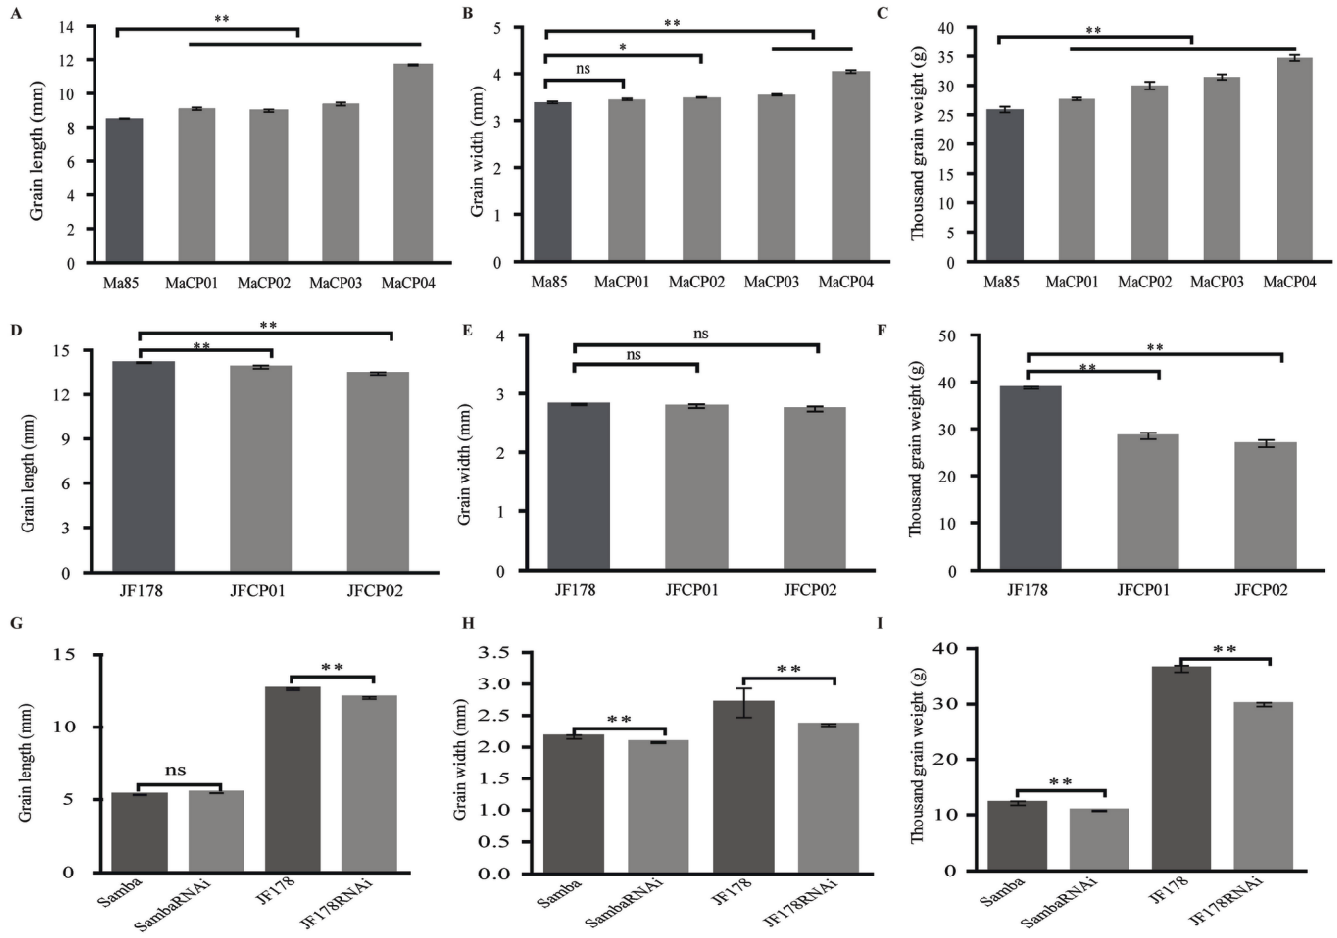

**Figure S4.** Grain shape traits of transgenic plants. (A-C) Comparison of grain length (A), grain width (B) and thousand grain weight (C) in Ma85 and transgenic Ma85 expressing the complementation vector *pLGS1::LGS1* (n~300-3000). (D-F) Comparison of grain length (D), grain width (E) and thousand grain weight (F) in the mutant line JF178 and transgenic JF178 expressing the complementation vector *pLgs1::lgs1* (n~300-3000). (G-I) Comparison of grain length (G), grain width (H) and thousand grain weight (I) in Samba, transgenic Samba expressing *lgs1*-RNAi, JF178, and transgenic JF178 expressing *LGS1*-RNAi (n~300-3000). Ma85, JF178, Samba and JF178 serve as controls in (A, B, C), (D, E, F), and (G, H, I), respectively. Values are given as the mean  $\pm$  SE. ns  $P > 0.05$ , \*  $P < 0.05$ , \*\*  $P < 0.01$  were calculated by Student's *t*-test.

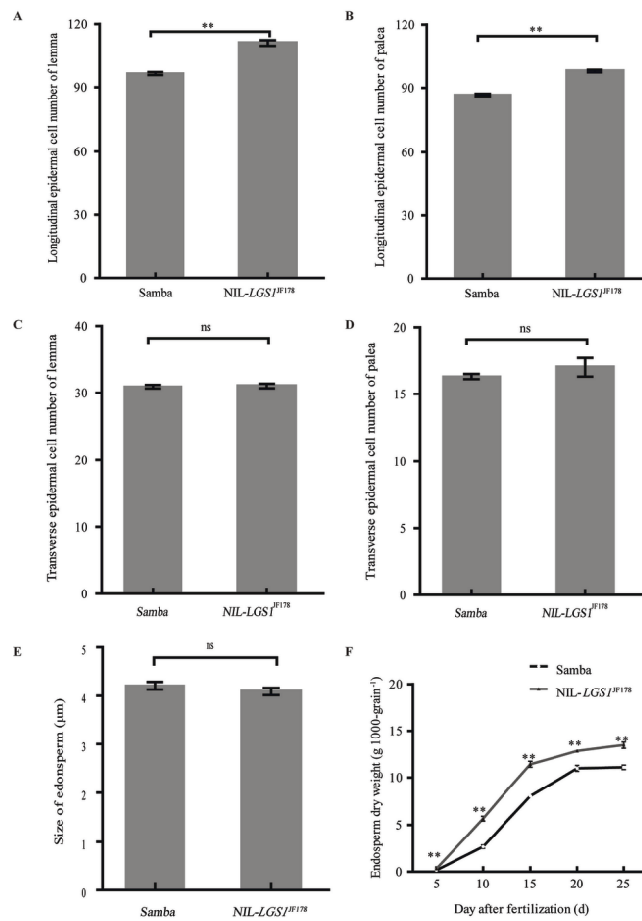

**Figure S5.** Glume cell number, endosperm size and grain filling dynamics of NILs. (A-E) Comparison of longitudinal epidermal cell number of lemma (A) and palea (B), transverse epidermal cell number of lemma (C) and palea (D), and endosperm size (E) between *Samba* and *NIL-LGSJ<sup>JF178</sup>*. (F) Time-course of endosperm dry weight increase (n=300). *Samba* as a control. Values are given as the mean  $\pm$  SE. ns  $P > 0.05$ , \*  $P < 0.05$ , \*\*  $P < 0.01$  were calculated by Student's *t*-test.

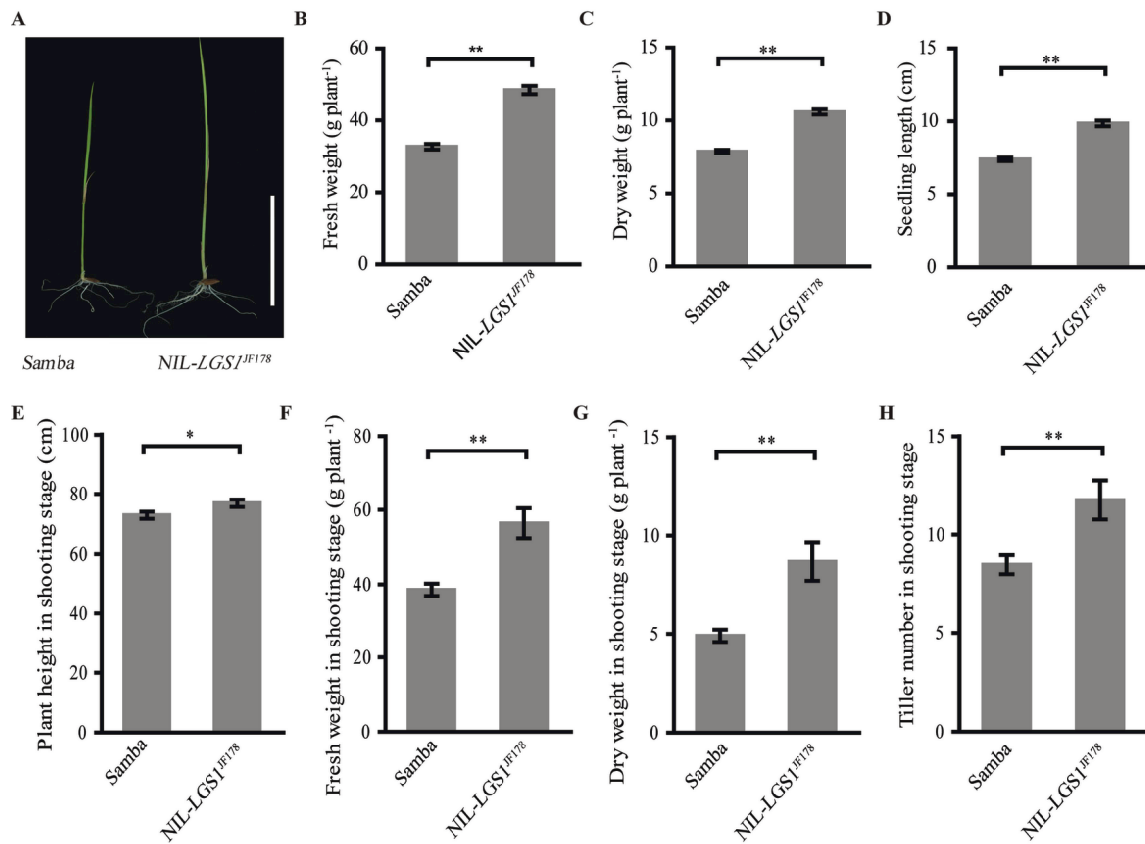

**Figure S6.** Biomass accumulation of NILs. (A) Morphology of NIL plants 10 days after germination. Scale bar, 5 cm. (B-D) Comparison of fresh weight (B), dry weight (C), and seedling length (D) of NIL plants 10 days after germination. (E-H) Comparison of plant height (E), fresh weight (F), dry weight (G), and tiller number (H) of NIL plants in the shooting stage. Samba as a control. Values are given as the mean  $\pm$  SE. ns  $P > 0.05$ , \*  $P < 0.05$ , \*\*  $P < 0.01$  were calculated by Student's  $t$ -test.

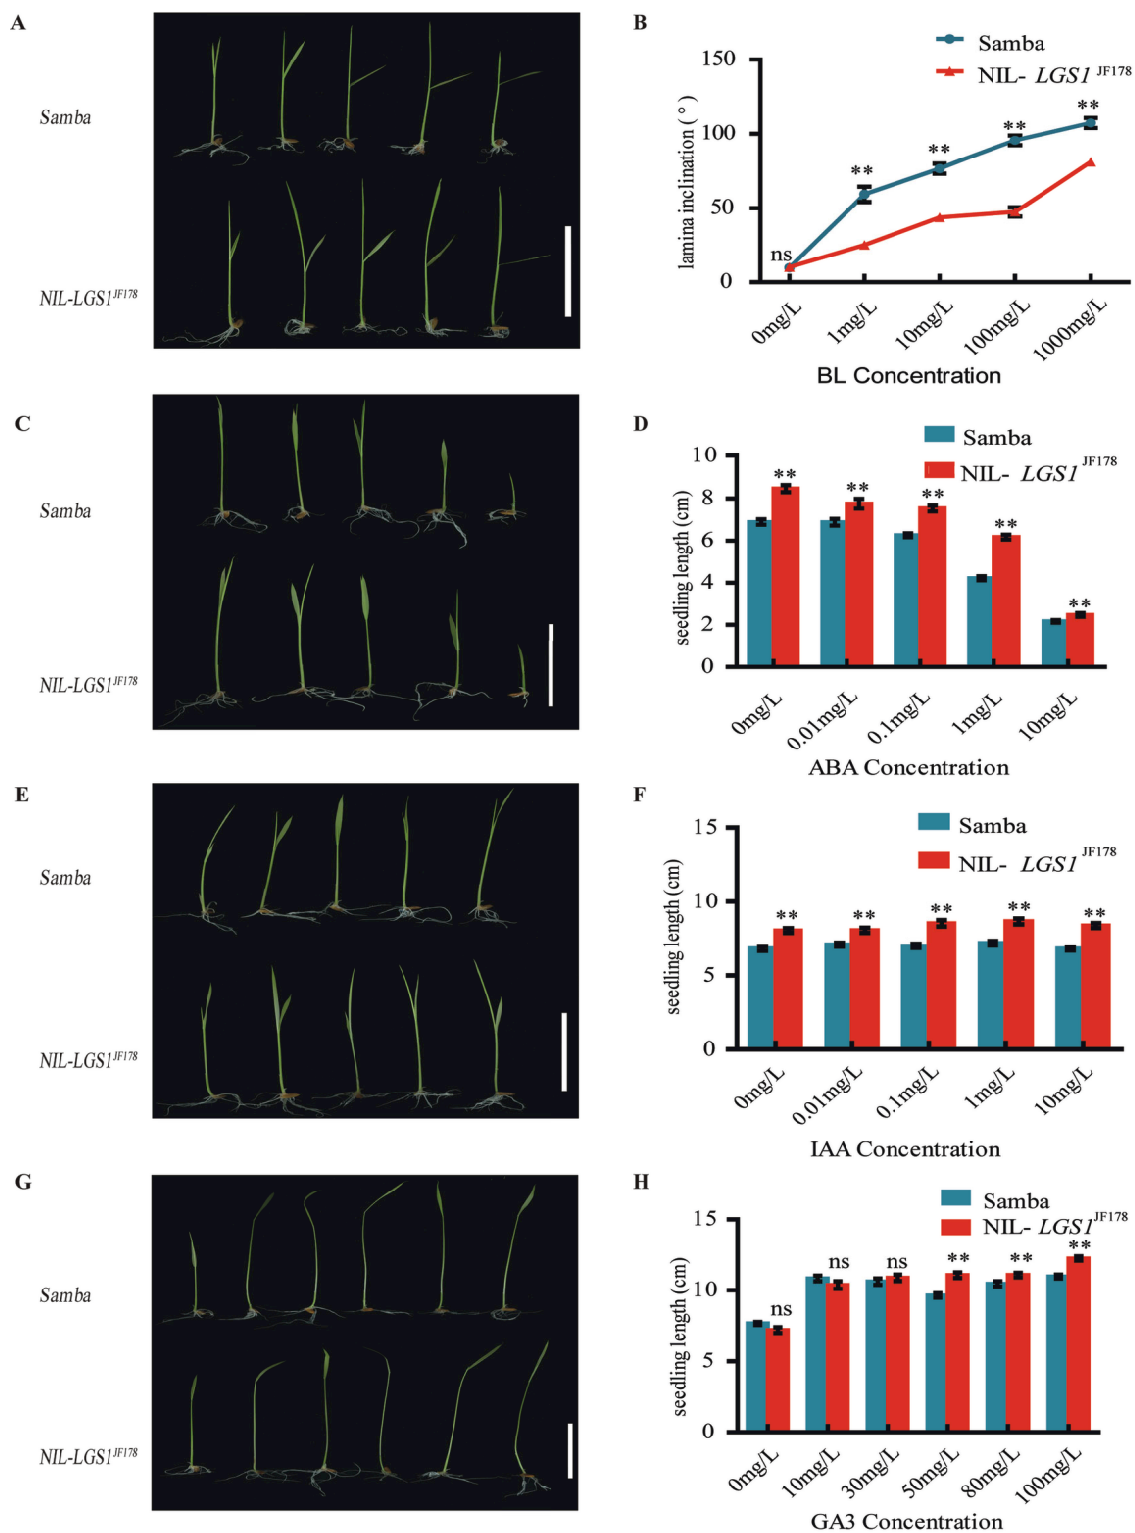

**Figure S7.** Response of NILs to plant hormone treatments. (A, C, E, G) Phenotypes of one-week old NIL plants in response to treatments with the plant hormone BL (A), ABA (C), IAA (E), and GA3 (G). Scale bar, 5 cm. The hormone concentrations are shown in the right panels (B, D, F, H). (B) Lamina inclination response of NIL plants to BL treatment. (D, F, H) Seedling length of one-week old NIL plants in response to treatments with ABA (D), IAA (F), and GA3 (H). Samba served as control. Values are given as the mean  $\pm$  SE. An ANOVA was used to generate the significant difference, ns  $P > 0.05$ , \*  $P < 0.05$ , \*\*  $P < 0.01$ .

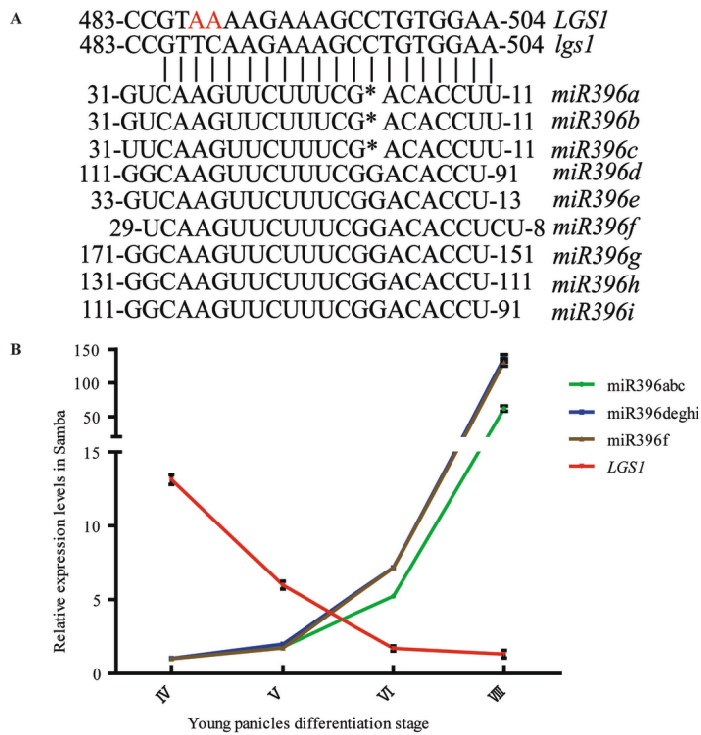

**Figure S8.** Targeting of the *LGS1* and *lgs1* mRNAs by *miR396*. (A) Pairing of the *LGS1* and *lgs1* mRNAs by *miR396* members. The nucleotide substitution of TC to AA at position 487 to 488 is marked in red in the *LGS1* mRNA. (B) qRT-PCR analysis of *miR396* and *LGS1* expression levels using total RNA isolated from young panicles of NIL plants (n=4). The relative expression levels of *miR396* in stage IV and *LGS1* in stage VIII of young panicles were set as 1. Values are given as the mean  $\pm$  SE.



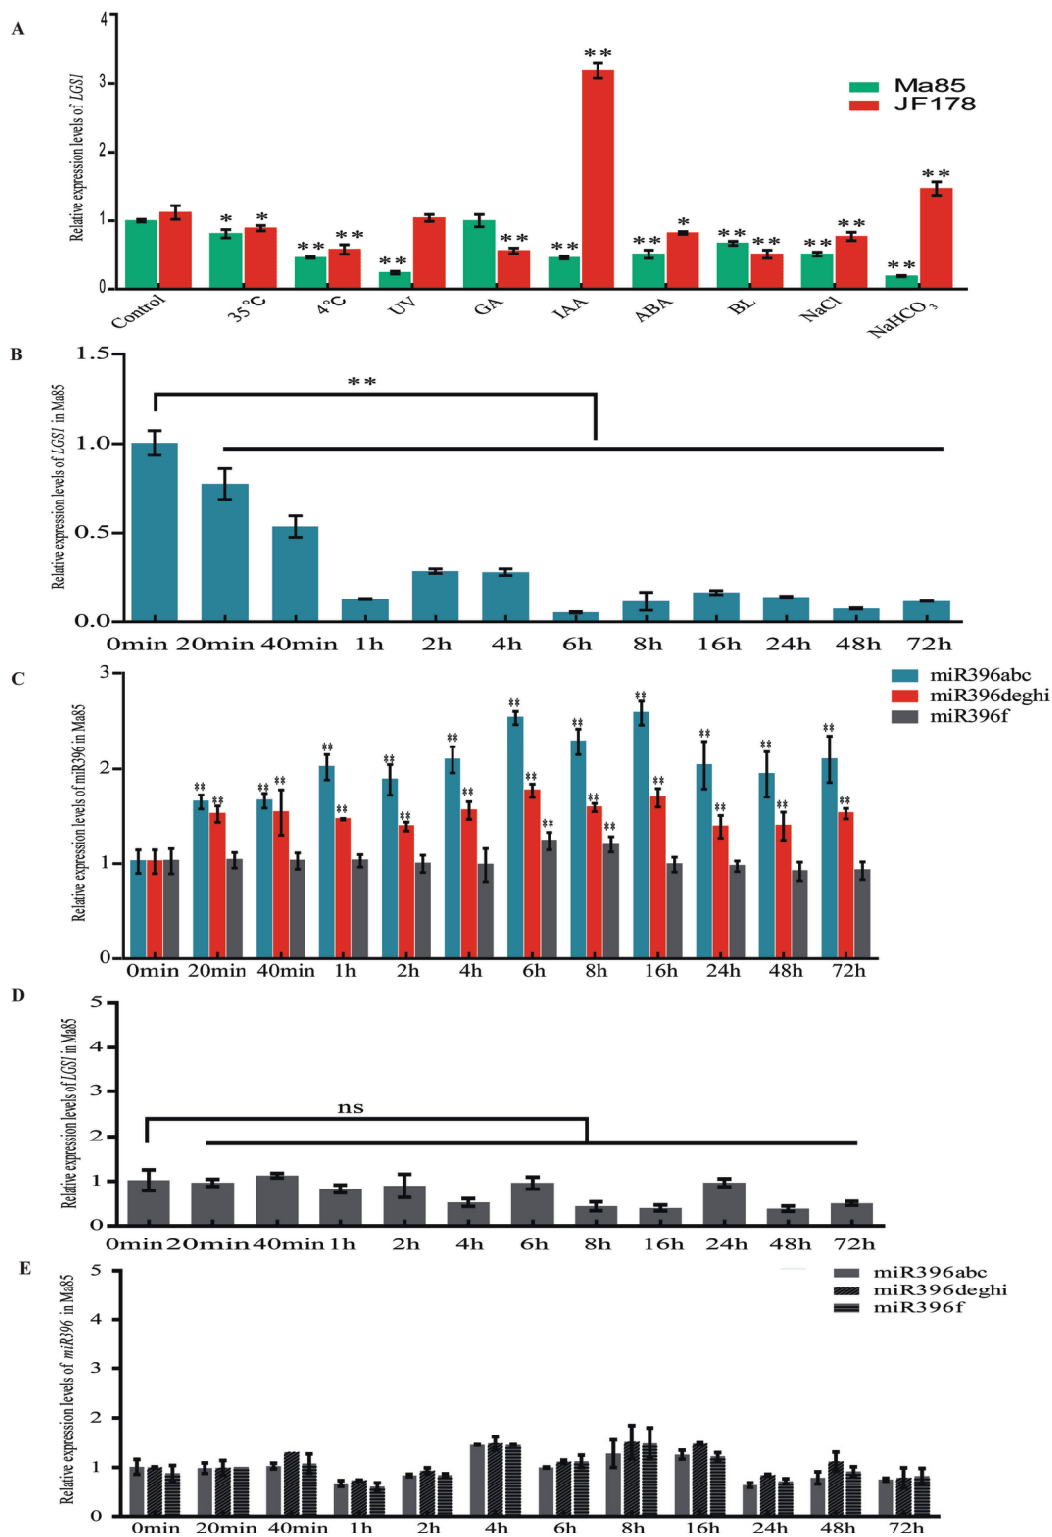

**Figure S9.** Expression levels of *LGS1* and *miR396* in response to low temperature stress. (A) qRT-PCR analysis of the *LGS1* mRNA using total RNA isolated from Ma85 and JF178 seedlings treated with abiotic stress and hormones (n=3). The relative expression levels of *lgs1* mRNA in Ma85 were set as 1. (B) Time course of *lgs1* transcript levels in Ma85 seedlings treated with 4 °C (n=3). The relative expression levels of *lgs1* mRNA in Ma85 at 0 min of cold treatment were set as 1. (C) Time course of *miR396* transcript levels in Ma85 treated with 4 °C (n=3). The relative expression levels of *miR396* in Ma85 at 0 min of cold treatment were set as 1. (D) Time course of *lgs1* transcript levels in Ma85 seedlings in the reversal experiment of cold treatment (n=3). The relative expression levels of *lgs1* mRNA in Ma85 at 0 min of cold treatment were set as 1. (E) Time course of *miR396* transcript levels in Ma85 in the reversal experiment of cold treatment (n=3). The relative expression levels of *miR396* in Ma85 at 0 min of cold treatment were set as 1. Values are given as the mean  $\pm$  SE. An ANOVA was used to generate the significant difference, ns  $P > 0.05$ , \*  $P < 0.05$ , \*\*  $P < 0.01$ .

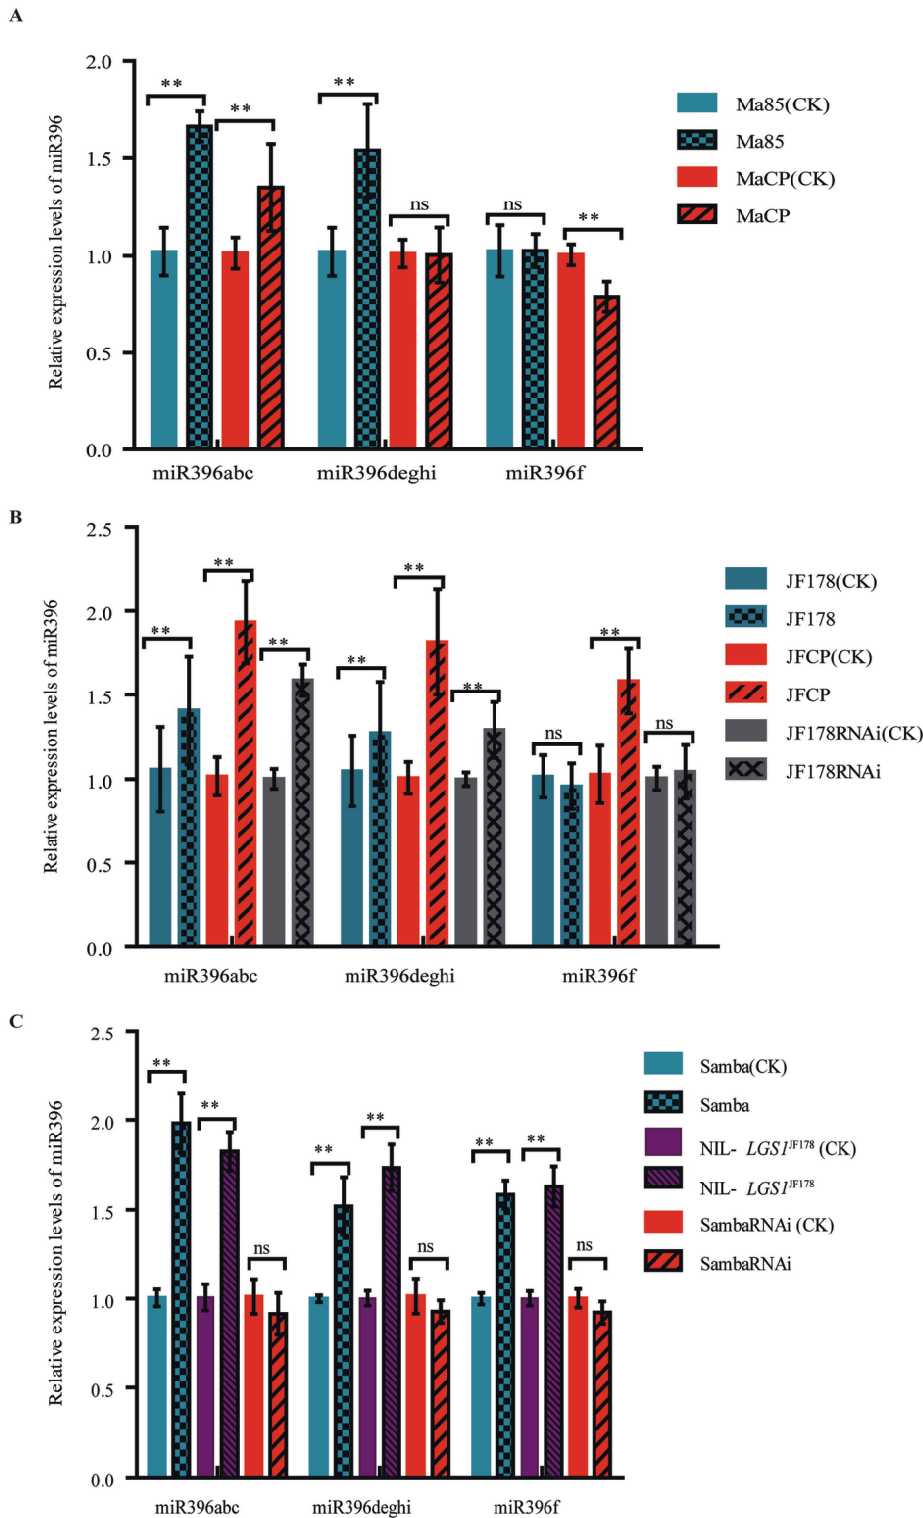

**Figure S10.** Expression levels of *miR396* members in Ma85, JF178, Samba, and transgenic lines in response to cold treatment. (A) Comparison of relative expression levels of *miR396* members in Ma85 and transgenic Ma85 expressing the complementation vector *pLGS1::LGS1* (n=3). (B) Comparison of relative expression levels of *miR396* members in JF178 and transgenic JF178 expressing the complementation vector *plgs1::lgs1* and JF178 RNA interference transgenic plants (n=3). (C) Comparison of relative expression levels of *miR396* members in Samba, NIL-*LGS1*<sup>JF178</sup> and transgenic Samba expressing RNAi (n=3). Solid bars represent control plants (CK) without cold treatment. Stretched bars represent samples that were treated with 4 °C cold stress for 40 min. The relative expression levels of *miR396* members in CK (control) were set as 1. Values are given as the mean ± SE. ns  $P > 0.05$ , \*  $P < 0.05$ , \*\*  $P < 0.01$  were calculated by Student's *t*-test.

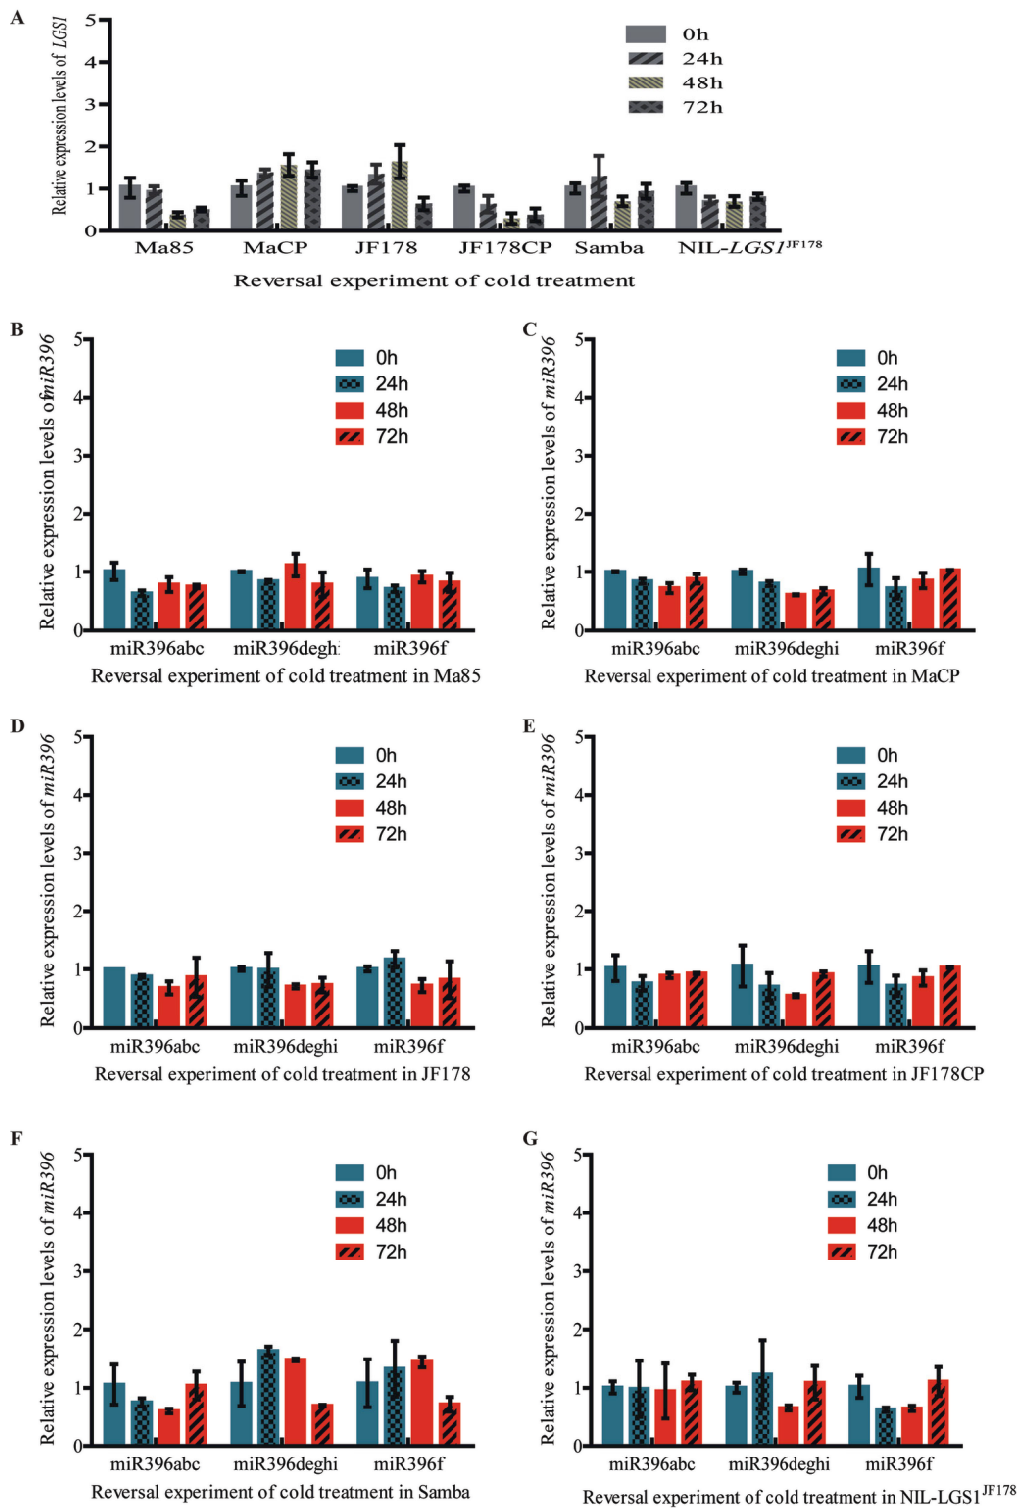

**Figure S11.** Expression levels of *LGS1* and *miR396* in rice seedlings after recovery from cold treatment. (A) Comparison of relative expression levels of *LGS1* in Ma85 and transgenic Ma85 expressing the complementation vector *pLGS1::LGS1*, JF178 and transgenic JF178 expressing the complementation vector *plgs1::lgs1*, Samba and NIL-*LGS1*<sup>JF178</sup> in response to reversal experiment of cold treatment (n=3). (B-G) Comparison of relative expression levels of *miR396* members in Ma85 (B), transgenic Ma85 expressing the complementation vector *pLGS1::LGS1*(C), JF178 (D), transgenic JF178 expressing the complementation vector *plgs1::lgs1*(E) Samba (F) and NIL-*LGS1*<sup>JF178</sup> (G) in response to reversal experiment of cold treatment (n=3). Values are given as the mean  $\pm$  SE. An ANOVA was used to generate the significant difference,  $P>0.05$ .

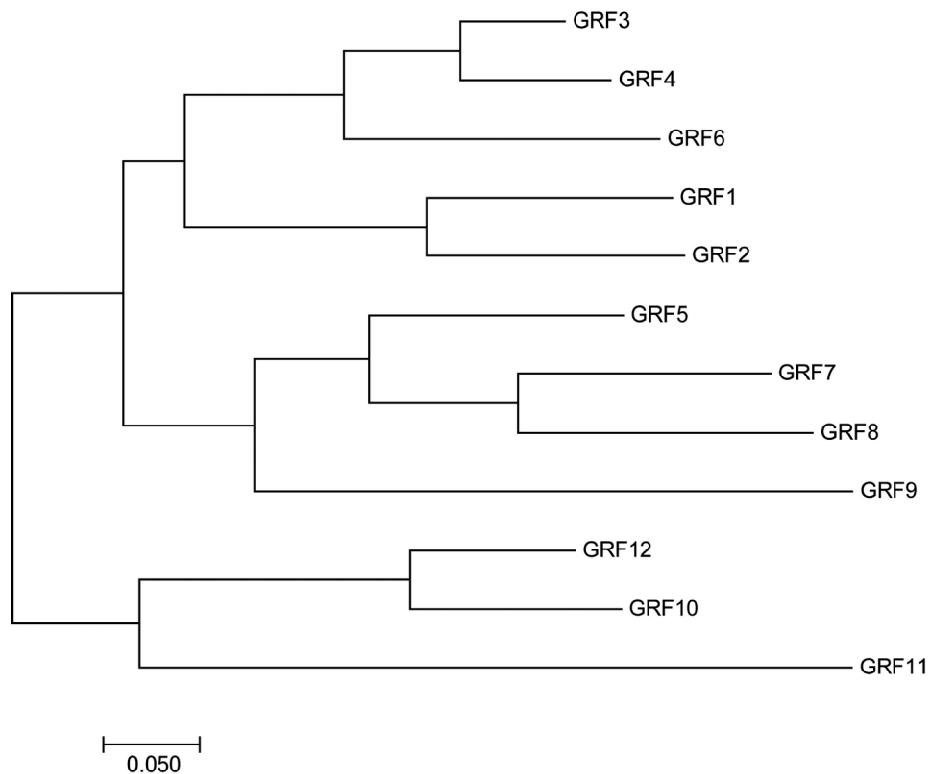

**Figure S12.** Phylogenetic tree of the OsGRF family members in rice. The MEGA7 Neighbour-Joining tree was inferred from the 12 amino acid sequences of the GRF4 homologs in *indica* rice. The tree is drawn to scale, with branch lengths in the same units as those of the evolutionary distances used to infer the phylogenetic tree. The evolutionary distances were computed using the Poisson correction method and were in units of the number of amino acid substitutions per site. All positions containing gaps and missing data were eliminated. Scale bar values are shown as their evolutionary notes.

## A Missense Mutation in *LGS1* Increases Grain Size and Enhances Cold Tolerance in Rice

X. Chen, L. Jiang, J. Zheng, F. Chen, T. Wang, M. Wang, Y. Tao, H. Wang, Z. Hong, Y. Huang and R. Huang

### Supplementary Tables:

**Table S1** Primers of vector construction and PCR analysis

| Primer name  | Sequence (5'-3')                | Purpose                          |
|--------------|---------------------------------|----------------------------------|
| GRF4-CPF1    | CCATGAGGTGGTTTGGTTGAG           | Gentic complementary test        |
| GRF4-CPR1    | CTTTAGTAATGGTGCTTTGCTTC         | Gentic complementary test        |
| GRF4-CPF2    | GGAAATGCTACTGCTCGTACCAC         | Gentic complementary test        |
| GRF4-CPR2    | CCAAAAGTTAGTATTCCTGTCATG        | Gentic complementary test        |
| GRF4-CPF3    | CTGCTCTGTGCATCAACTGTTAG         | Gentic complementary test        |
| GRF4-CPR3    | CCTGCAGGATGCGAAACCACCGAGC       | Gentic complementary test        |
| LGS1_5K      | GCCGGTACCGCACCATTACTAAAGACCGCGG | RNA interference of <i>LGS1</i>  |
| LGS1_3S      | CGCGAGCTCGCGGAGAGCGGGGTGGAG     | RNA interference of <i>LGS1</i>  |
| LGS1_5B      | CGCGGATCCGCACCATTACTAAAGACCGCGG | RNA interference of <i>LGS1</i>  |
| LGS1_3P      | CGCCTGCAGCGGAGAGCGGGGTGGAG      | RNA interference of <i>LGS1</i>  |
| GRF4_GUS_F   | CCATGAGGTGGTTTGGTTGAG           | Promoter expression pattern test |
| GRF4_GUS_R   | ATGGATCCACCGCCGAGACAGGGAG       | Promoter expression pattern test |
| GFP_LGS1_F   | GCACTAGTATGGCGATGCCGTATGCCTCC   | Subcellular localization test    |
| GFP_LGS1_R   | CGACTAGTTCAGTCACCATTAGTTGATCG   | Subcellular localization test    |
| GRF4_BD_F    | GGAATTCATGGCGATGCCGTATGCCTCC    | Y2H construct                    |
| GRF4_BD_R    | CGGATCCTCAGTCACCATTAGTTGATCG    | Y2H construct                    |
| GRF4_C_BD_F2 | GGAATTC AAGCCTGTGGAAACGCAGCTG   | Y2H construct                    |
| GRF4_N_BD_R2 | CGGATCCGACCAGCTGCGTTTCCACAGG    | Y2H construct                    |
| GIF1_AD_F    | GGAATTCATGCAGCAGCAGATGGCCATGC   | Y2H construct                    |
| GIF1_AD_R    | CGGATCCGGACTTCTCCGCTATGTCACCGC  | Y2H construct                    |
| GIF2_AD_F    | GGAATTCATGCAGCAGCAGCCGATGCCG    | Y2H construct                    |
| GIF2_AD_R    | CGGATCCGGATTGATCGCCGAAGTCGCTTC  | Y2H construct                    |
| GIF3_AD_F    | GGAATTCATGCAGCAGCAACACCTGAT     | Y2H construct                    |
| GIF3_AD_R    | CGGATCCGCTGCCTTCTCCTCGGTGC      | Y2H construct                    |
| GRF4_F1      | AAAGCACCATTACTAAAGACCG          | Polymorphisms of GRF4 analysis   |
| GRF4_R1      | GCAAAACAAATGGGACACAG            | Polymorphisms of GRF4 analysis   |
| GRF4_F2      | GGTGGTGAACAGGCAAAG              | Polymorphisms of GRF4 analysis   |
| GRF4_R2      | CCATGTACCGGAGGAAATGT            | Polymorphisms of GRF4 analysis   |
| GRF4_F3      | GCAACTAACTGTCTTCTGGT            | Polymorphisms of GRF4 analysis   |
| GRF4_R3      | CAAAGGAGACCACGGAGTT             | Polymorphisms of GRF4 analysis   |
| qActinF      | ATCCTTCGCTCGACCTTGC             | qRT-PCR analysis                 |
| qActinR      | TGGCAGTCTCCATTTCTCGG            | qRT-PCR analysis                 |

|                  |                                                         |                         |
|------------------|---------------------------------------------------------|-------------------------|
| qLGS1F           | ACCACTCTCTTTACCCTGCT                                    | qRT-PCR analysis        |
| qLGS1R           | TCTGCTCATCCGCCAAAGAT                                    | qRT-PCR analysis        |
| MIR396a/b/e_RT   | GTCGTATCCAGTGCAGGGTCCGAGGTATTTCGCACTGGATACG<br>ACCAGTTC | miR396 qRT-PCR analysis |
| MIR396c_RT       | GTCGTATCCAGTGCAGGGTCCGAGGTATTTCGCACTGGATACG<br>ACAAGTTC | miR396 qRT-PCR analysis |
| MIR396d/g/h/i_RT | GTCGTATCCAGTGCAGGGTCCGAGGTATTTCGCACTGGATACG<br>ACCCGTTT | miR396 qRT-PCR analysis |
| MIR396f_RT       | GTCGTATCCAGTGCAGGGTCCGAGGTATTTCGCACTGGATACG<br>ACAGTTCA | miR396 qRT-PCR analysis |
| MIR396a/b_F      | ACGCGCGTTCCACAGCTTTCTT                                  | miR396 qRT-PCR analysis |
| MIR396c_F        | TCGCGCGTTCCACAGCTTTCTT                                  | miR396 qRT-PCR analysis |
| MIR396d/g/h/i_F  | GGCGCGTCCACAGGCTTTCTT                                   | miR396 qRT-PCR analysis |
| MIR396e_F        | CGCGCGTCCACAGGCTTTCTT                                   | miR396 qRT-PCR analysis |
| MIR396f_F        | ACGCGTCTCCACAGGCTTTCTT                                  | miR396 qRT-PCR analysis |
| MIR396_R         | ATCCAGTGCAGGGTCCGAGG                                    | miR396 qRT-PCR analysis |
| U6_F             | GGGACATCCGATAAAATTGGAA                                  | miR396 qRT-PCR analysis |
| U6_R             | ATTTGGACCATTCTCGATTTGT                                  | miR396 qRT-PCR analysis |

**Table S2** Polymorphisms of *LGS1* coding sequence in different Accessions

| Subspecies | Accessions      | Mutation sites in CDS |         |         |     | Grain shape traits        |                   |                  | haplotype |
|------------|-----------------|-----------------------|---------|---------|-----|---------------------------|-------------------|------------------|-----------|
|            |                 | 4                     | 122-123 | 487-488 | 894 | thousand grain weight (g) | Grain length (mm) | Grain width (mm) |           |
| Indica     | JF178           | A                     | TT      | AA      | T   | 39.01                     | 13.90             | 2.80             | I         |
| Japonica   | NIL-LGS1        | A                     | TT      | AA      | T   | 15.94                     | 7.47              | 2.83             | I         |
| Japonica   | Samba           | G                     | GC      | TC      | G   | 11.17                     | 6.21              | 2.46             | III       |
| Indica     | JF608           | A                     | TT      | AA      | T   | 37.13                     | 10.17             | 3.01             | I         |
| Indica     | JF612           | A                     | TT      | AA      | T   | 39.01                     | 10.05             | 3.02             | I         |
| Indica     | JF613           | A                     | TT      | AA      | T   | 34.44                     | 11.16             | 2.84             | I         |
| Indica     | JiaHe 18        | A                     | TT      | AA      | T   | 41.00                     | 13.61             | 2.70             | I         |
| Indica     | JF190           | A                     | TT      | AA      | T   | 35.51                     | 12.54             | 2.55             | I         |
| Indica     | JF3             | A                     | TT      | AA      | T   | 38.82                     | 13.30             | 2.80             | I         |
| Indica     | JF171           | A                     | TT      | AA      | T   | 40.15                     | 11.70             | 3.30             | I         |
| Indica     | JF42            | A                     | TT      | AA      | T   | 55.50                     | 13.89             | 3.34             | I         |
| Indica     | JF49            | A                     | TT      | AA      | T   | 55.08                     | 13.70             | 3.19             | I         |
| Indica     | JF50            | A                     | TT      | AA      | T   | 54.27                     | 13.78             | 3.30             | I         |
| Indica     | JF125           | A                     | TT      | AA      | T   | 41.14                     | 13.24             | 2.75             | I         |
| Indica     | Ma85            | A                     | TT      | TC      | T   | 25.90                     | 8.52              | 3.39             | II        |
| Indica     | AiJiaoNanTe     | A                     | TT      | TC      | T   | 27.88                     | 7.58              | 3.04             | II        |
| Indica     | 9311            | A                     | TT      | TC      | T   | 32.26                     | 9.08              | 2.63             | II        |
| Indica     | HuaZhan         | A                     | TT      | TC      | T   | 21.26                     | 8.54              | 2.14             | II        |
| Indica     | JiaFuZhan       | A                     | TT      | TC      | T   | 30.01                     | 10.74             | 2.40             | II        |
| Indica     | LuB             | A                     | TT      | TC      | T   | 22.28                     | 9.26              | 2.22             | II        |
| Indica     | MingHui 3301    | A                     | TT      | TC      | T   | 30.67                     | 10.34             | 2.49             | II        |
| Indica     | ZhongHui 8006   | A                     | TT      | TC      | T   | 26.83                     | 9.36              | 2.52             | II        |
| Indica     | Gui 99          | A                     | TT      | TC      | T   | 22.45                     | 9.34              | 2.16             | II        |
| Indica     | MingHui 86      | A                     | TT      | TC      | T   | 29.42                     | 8.74              | 2.85             | II        |
| Indica     | MingHui 2155    | A                     | TT      | TC      | T   | 23.35                     | 8.67              | 2.40             | II        |
| Indica     | ShuHui 527      | A                     | TT      | TC      | T   | 33.07                     | 10.27             | 2.63             | II        |
| Indica     | MingHui 63      | A                     | TT      | TC      | T   | 26.94                     | 9.06              | 2.61             | II        |
| Indica     | FengXiangHui 1  | A                     | TT      | TC      | T   | 30.67                     | 8.99              | 2.57             | II        |
| Indica     | YuZhenXiang     | A                     | TT      | TC      | T   | 26.24                     | 11.45             | 2.11             | II        |
| Indica     | HuangHuaZhan    | A                     | TT      | TC      | T   | 21.83                     | 8.52              | 2.10             | II        |
| Indica     | TaiZhongXian 17 | A                     | TT      | TC      | T   | 31.14                     | 7.97              | 3.10             | II        |
| Indica     | TaiZhongXian 10 | A                     | TT      | TC      | T   | 23.33                     | 8.59              | 2.56             | II        |
| Indica     | JiaZhao 1       | A                     | TT      | TC      | T   | 29.48                     | 10.96             | 2.41             | II        |
| Indica     | GuangLuAi 4     | A                     | TT      | TC      | T   | 24.54                     | 7.38              | 2.84             | II        |
| Indica     | II-32B          | A                     | TT      | TC      | T   | 22.72                     | 7.33              | 2.65             | II        |
| Indica     | V20B            | A                     | TT      | TC      | T   | 27.59                     | 8.35              | 2.92             | II        |
| Indica     | YiXiangB        | A                     | TT      | TC      | T   | 29.80                     | 9.25              | 2.56             | II        |
| Indica     | ZhenShan 97B    | A                     | TT      | TC      | T   | 24.14                     | 7.48              | 2.91             | II        |
| Indica     | TianFengB       | A                     | TT      | TC      | T   | 21.96                     | 8.21              | 2.24             | II        |
| Indica     | TaiFengB        | A                     | TT      | TC      | T   | 23.44                     | 9.77              | 2.09             | II        |
| Japonica   | Nipponbare      | G                     | GC      | TC      | G   | 25.64                     | 6.89              | 2.96             | III       |
| Japonica   | ZhongHua 11     | G                     | GC      | TC      | G   | 25.41                     | 8.10              | 3.49             | III       |
| Japonica   | QiuGuang        | G                     | GC      | TC      | G   | 26.94                     | 6.61              | 3.14             | III       |
| Japonica   | Koshihikari     | G                     | GC      | TC      | G   | 27.01                     | 6.83              | 3.17             | III       |
| Japonica   | ShenNong606     | G                     | GC      | TC      | G   | 23.82                     | 6.42              | 3.10             | III       |
| Japonica   | ShenNong265     | G                     | GC      | TC      | G   | 24.08                     | 6.75              | 3.21             | III       |
| Japonica   | TaiNong 71      | G                     | GC      | TC      | G   | 26.29                     | 6.90              | 3.25             | III       |

**Table S3** Polymorphisms of *LGS1* non-coding sequence in different Accessions

| Subspecies | Accessions | Mutation sites in non-coding regions |     |     |         |      |      |      |      |      |        |      |        |      |      |         |
|------------|------------|--------------------------------------|-----|-----|---------|------|------|------|------|------|--------|------|--------|------|------|---------|
|            |            | 598                                  | 728 | 741 | 1641    | 1695 | 1748 | 1788 | 1832 | 2183 | 2341   | 2362 | 2649   | 2668 | 3417 | 3568    |
|            |            | Intron2                              |     |     | Intron3 |      |      |      |      |      |        |      |        |      |      | Intron4 |
| Japonica   | Nipponbare | C                                    | A   | T   | C       | A    | T    | T    | A    | G    | A      | C    | Delete | A    | G    | A       |
| Indica     | Ma85       | C                                    | C   | T   | T       | T    | C    | T    | A    | A    | A      | C    | Delete | G    | G    | T       |
| Indica     | JF178      | T                                    | T   | A   | T       | T    | C    | C    | T    | A    | Delete | T    | T      | A    | C    | T       |
| Indica     | JF190      | T                                    | T   | A   | T       | T    | C    | C    | T    | A    | Delete | T    | T      | A    | C    | T       |
| Indica     | JF608      | T                                    | T   | A   | T       | T    | C    | C    | T    | A    | Delete | T    | T      | A    | C    | T       |
| Indica     | JF612      | T                                    | T   | A   | T       | T    | C    | C    | T    | A    | Delete | T    | T      | A    | C    | T       |
| Indica     | JF613      | T                                    | T   | A   | T       | T    | C    | C    | T    | A    | Delete | T    | T      | A    | C    | T       |
| Indica     | JF42       | T                                    | T   | A   | T       | T    | C    | C    | T    | A    | Delete | T    | T      | A    | C    | T       |
| Indica     | JF49       | T                                    | T   | A   | T       | T    | C    | C    | T    | A    | Delete | T    | T      | A    | C    | T       |
| Indica     | JF50       | T                                    | T   | A   | T       | T    | C    | C    | T    | A    | Delete | T    | T      | A    | C    | T       |
| Indica     | JF125      | T                                    | T   | A   | T       | T    | C    | C    | T    | A    | Delete | T    | T      | A    | C    | T       |
| Indica     | JiaHe 18   | T                                    | T   | A   | T       | T    | C    | C    | T    | A    | Delete | T    | T      | A    | C    | T       |



**Table S4** Young panicles differentiation stage of rice

| Differentiation Stage |                                                | Morphological features of the young panicles (Length: cm) |
|-----------------------|------------------------------------------------|-----------------------------------------------------------|
| Stage I               | Differentiation of the first bract primordium  | < 0.05                                                    |
| Stage II              | Differentiation of primary branch primordium   | 0.1~0.2                                                   |
| Stage III             | Differentiation of secondary branch primordium | 0.2~0.5                                                   |
| Stage IV              | Differentiation of stamen and pistil primordia | 1.2~2.0                                                   |
| Stage V               | Formation stage of pollen mother cell          | 3.0~4.0                                                   |
| Stage VI              | Meiotic division of pollen mother cell         | 6.0~10.0                                                  |
| Stage VII             | Filling stage of pollen                        | 12.0~18.0                                                 |
| Stage VIII            | Ripe stage of pollen                           | 23.0~29.0                                                 |

**Table S5** RNA-seq analysis of cell cycle gene in NILs

| ID           | Gene name      | T01_FPKM  | T02_FPKM  | T03_FPKM  | T04_FPKM  | T05_FPKM  | T06_FPKM   | Regulated |
|--------------|----------------|-----------|-----------|-----------|-----------|-----------|------------|-----------|
| Os03g0607600 | <i>CycA3;1</i> | 12.169201 | 11.372901 | 4.9661161 | 8.6902539 | 7.0741475 | 9.58283534 | Down      |
| Os12g0581800 | <i>CycA3;2</i> | 9.84795   | 9.77362   | 7.73458   | 16.7776   | 15.5947   | 14.534     | UP        |
| Os01g0805600 | <i>CycB1;1</i> | 29.86542  | 33.24025  | 19.45278  | 50.610485 | 45.221434 | 44.9396884 | UP        |
| Os01g0281100 | <i>CycB1;3</i> | 14.67391  | 11.66475  | 9.867508  | 18.78556  | 17.05995  | 8.51133    | UP        |
| Os02g0627800 | <i>CycB1;4</i> | 0         | 0         | 0         | 0         | 0         | 0          | -         |
| Os05g0493500 | <i>CycB1;5</i> | 26.249308 | 27.009523 | 14.08942  | 35.65628  | 34.7475   | 30.527934  | UP        |
| Os04g0563700 | <i>CycB2;1</i> | 13.290369 | 14.40787  | 13.45601  | 32.1472   | 35.29541  | 26.43443   | UP        |
| Os06g0726800 | <i>CycB2;2</i> | 8.14767   | 9.66444   | 5.32472   | 16.0957   | 17.5909   | 15.1307    | UP        |
| Os06g0236600 | <i>CycD1;1</i> | 0.189925  | 1.09982   | 2.39882   | 1.23655   | 0.571106  | 1.0458     | Down      |
| Os08g0421100 | <i>CycD1;2</i> | 2.6220866 | 2.0340374 | 3.513396  | 1.7381703 | 0.8979751 | 1.87815234 | Down      |
| Os09g0382300 | <i>CycD2;1</i> | 5.5465115 | 7.5240223 | 3.3205291 | 5.7348742 | 5.2754547 | 6.40499435 | UP        |
| Os07g0620800 | <i>CycD2;2</i> | 6.29077   | 7.46474   | 1.66463   | 22.3388   | 20.362    | 12.8868    | UP        |
| Os03g0392000 | <i>CycD2;3</i> | 0         | 0         | 0         | 0         | 0         | 0          | -         |
| Os06g0217900 | <i>CycD3;1</i> | 6.209172  | 3.112091  | 2.307903  | 7.9742    | 2.323368  | 5.1874     | UP        |
| Os09g0111100 | <i>CycD3;2</i> | 33.2026   | 41.6923   | 11.7673   | 21.2938   | 28.3902   | 20.6171    | Down      |
| Os09g0466100 | <i>CycD4;1</i> | 8.93578   | 9.90485   | 4.188664  | 18.504873 | 14.362119 | 12.47977   | UP        |
| Os08g0479300 | <i>CycD4;2</i> | 10.86991  | 11.76684  | 3.92916   | 9.93028   | 10.70146  | 7.52436    | UP        |
| Os03g0617500 | <i>CycD5;1</i> | 5.9007934 | 8.564505  | 6.5462647 | 5.1729092 | 7.032416  | 8.41249803 | Down      |
| Os12g0588800 | <i>CycD5;2</i> | 17.8999   | 11.538106 | 7.869505  | 9.840284  | 7.463566  | 13.24792   | Down      |
| Os03g0203800 | <i>CycD5;3</i> | 11.3626   | 8.27938   | 4.99436   | 12.5465   | 19.881    | 10.2859    | UP        |
| Os07g0556000 | <i>CycD6;1</i> | 37.4215   | 34.52095  | 26.00392  | 15.5876   | 22.90179  | 27.37947   | Down      |
| Os11g0706801 | <i>CycD7;1</i> | 0.8555616 | 0.567595  | 0.5233965 | 0.6779946 | 0.1204958 | 0.27200773 | Down      |
| Os02g0607400 | <i>CycF1;1</i> | 0         | 0         | 0.123477  | 0         | 0         | 0          | -         |
| Os02g0604600 | <i>CycF1;2</i> | 0         | 0.427991  | 0.267663  | 0         | 0         | 0          | -         |
| Os02g0604800 | <i>CycF1;3</i> | 0.4376841 | 1.1853209 | 0.0839799 | 0         | 0         | 0.25294832 | Down      |
| Os02g0604700 | <i>CycF1;4</i> | 0         | 0.423872  | 0.360301  | 0         | 0         | 0          | -         |
| Os02g0607000 | <i>CycF2;1</i> | 0         | 0.615934  | 0.440122  | 0         | 0         | 0.0791145  | Down      |
| Os02g0605000 | <i>CycF2;2</i> | 0.692007  | 0.646039  | 1.17749   | 0         | 0         | 0          | -         |
| Os02g0600200 | <i>CycF2;3</i> | 22.462343 | 26.970645 | 19.302792 | 45.59772  | 21.716725 | 24.52302   | UP        |
| Os03g0208700 | <i>CycF3;1</i> | 1.27341   | 1.25947   | 0.650247  | 2.03257   | 2.54339   | 1.75643    | UP        |
| Os03g0208800 | <i>CycF3;2</i> | 2.10143   | 1.66247   | 0.973445  | 3.20836   | 3.56183   | 3.55136    | UP        |
| Os03g0737600 | <i>CycH1;1</i> | 3.766162  | 3.6784723 | 2.954005  | 6.878243  | 5.6244155 | 5.787945   | UP        |
| Os02g0133000 | <i>CycT1;1</i> | 9.51394   | 10.7938   | 14.5027   | 15.5139   | 25.6445   | 18.3751    | UP        |
| Os02g0438200 | <i>CycT1;2</i> | 3.4361428 | 2.3968271 | 3.2621307 | 5.952762  | 5.009606  | 6.06993573 | UP        |
| Os11g0157100 | <i>CycT1;3</i> | 19.795534 | 18.738158 | 21.438104 | 30.364379 | 30.090595 | 30.79093   | UP        |
| Os12g0485400 | <i>CycT1;4</i> | 17.459721 | 16.034824 | 14.322025 | 26.657784 | 23.600053 | 23.6905981 | UP        |
| Os01g0377500 | <i>CycL1;1</i> | 25.4874   | 23.4473   | 24.1334   | 36.9548   | 35.3423   | 33.5228    | UP        |
| Os04g0628900 | <i>CycP1;1</i> | 21.19949  | 22.80527  | 13.6835   | 8.68238   | 7.6439    | 12.10559   | Down      |
| Os04g0552300 | <i>CycP2;1</i> | 46.3786   | 42.1703   | 70.5215   | 36.1738   | 52.9232   | 48.1879    | Down      |
| Os05g0398000 | <i>CycP3;1</i> | 0.150045  | 0.148182  | 0.190389  | 0.368508  | 0.0945624 | 0.44799    | UP        |
| Os10g0563900 | <i>CycP4;1</i> | 43.7429   | 31.98353  | 73.5211   | 7.18217   | 11.11594  | 21.1695    | Down      |

|              |                 |           |           |           |           |           |            |      |
|--------------|-----------------|-----------|-----------|-----------|-----------|-----------|------------|------|
| Os05g0392300 | <i>CAK1</i>     | 12.429972 | 11.717285 | 11.31906  | 11.82408  | 13.28238  | 14.37725   | UP   |
| Os03g0118400 | <i>cdc2Os-1</i> | 111.09579 | 126.07043 | 101.0288  | 104.98067 | 107.42235 | 105.861554 | Down |
| Os02g0123100 | <i>cdc2Os-2</i> | 11.114617 | 8.6039302 | 6.2825122 | 14.3707   | 11.881998 | 12.3164536 | UP   |
| Os02g0133000 | <i>CYCT1;1</i>  | 9.51394   | 10.7938   | 14.5027   | 15.5139   | 25.6445   | 18.3751    | UP   |
| Os02g0438200 | <i>CYCT1;2</i>  | 3.4361428 | 2.3968271 | 3.2621307 | 5.952762  | 5.009606  | 6.06993573 | UP   |
| Os11g0157100 | <i>CYCT1;3</i>  | 19.795534 | 18.738158 | 21.438104 | 30.364379 | 30.090595 | 30.79093   | UP   |
| Os12g0485400 | <i>CYCT1;4</i>  | 17.459721 | 16.034824 | 14.322025 | 26.657784 | 23.600053 | 23.6905981 | UP   |
| Os06g0726800 | <i>CYCB2;2</i>  | 8.14767   | 9.66444   | 5.32472   | 16.0957   | 17.5909   | 15.1307    | UP   |
| Os04g0563700 | <i>CYCB2;1</i>  | 13.290369 | 14.40787  | 13.45601  | 32.1472   | 35.29541  | 26.43443   | UP   |
| Os12g0502300 | <i>CYCA2;2</i>  | 4.71226   | 3.850005  | 2.658943  | 8.16352   | 10.44763  | 7.50078    | UP   |
| Os06g0154500 | <i>MPK1</i>     | 17.2254   | 15.4787   | 21.114    | 23.6199   | 26.4095   | 24.5133    | UP   |
| Os08g0157000 | <i>MPK2</i>     | 0.779082  | 0.8091614 | 0.6731556 | 0.5016514 | 0.390529  | 0.47478671 | Down |
| Os02g0148100 | <i>MPK3</i>     | 14.29565  | 16.17586  | 33.4215   | 23.2425   | 30.00783  | 34.85982   | UP   |
| Os06g0699400 | <i>MPK4</i>     | 38.44271  | 40.86008  | 44.66355  | 59.88188  | 62.67045  | 57.97737   | UP   |
| Os03g0285800 | <i>MPK5</i>     | 45.085297 | 67.208733 | 38.548955 | 39.823205 | 136.60976 | 40.8981794 | UP   |
| Os10g0533600 | <i>MPK6</i>     | 10.80913  | 11.29041  | 20.672168 | 22.53027  | 25.94685  | 21.71149   | UP   |
| Os05g0566400 | <i>MPK7</i>     | 16.678374 | 32.067725 | 41.599024 | 16.070541 | 93.21254  | 37.86544   | UP   |
| Os01g0665200 | <i>MPK8</i>     | 20.571272 | 26.514415 | 36.548145 | 22.370532 | 41.071433 | 30.6338109 | UP   |
| Os05g0582400 | <i>MPK9</i>     | 1.9064409 | 2.682685  | 3.556637  | 1.6134358 | 3.5505854 | 2.974388   | -    |
| Os01g0629900 | <i>MPK10</i>    | 36.557649 | 45.772992 | 63.308664 | 49.232978 | 59.425896 | 52.0538843 | UP   |
| Os06g0367900 | <i>MPK11</i>    | 3.08425   | 1.942911  | 2.246826  | 5.85012   | 5.39879   | 4.63241    | UP   |
| Os06g0708000 | <i>MPK12</i>    | 107.95266 | 114.47762 | 153.33239 | 126.86882 | 160.3483  | 113.58996  | UP   |
| Os11g0484300 | <i>MCM2</i>     | 6.15811   | 5.56317   | 2.49784   | 6.82491   | 4.40312   | 7.01468    | UP   |
| Os05g0476200 | <i>MCM3</i>     | 9.5603857 | 9.4827578 | 4.620653  | 15.18252  | 7.8421848 | 11.44211   | UP   |
| Os01g0544450 | <i>MCM4</i>     | 10.7226   | 10.8005   | 4.71324   | 9.94884   | 5.48857   | 9.34363    | -    |
| Os02g0797400 | <i>MCM5</i>     | 9.76113   | 10.1062   | 3.52421   | 7.98316   | 3.97948   | 8.04055    | Down |
| Os05g0235800 | <i>MCM6</i>     | 4.72371   | 5.09894   | 1.869016  | 5.4605629 | 3.67403   | 5.61816568 | UP   |
| Os12g0560700 | <i>MCM7</i>     | 4.53444   | 4.52654   | 2.0244    | 4.58943   | 2.74804   | 3.71389    | -    |
| Os05g0464100 | <i>MCM8</i>     | 0.376982  | 0.1584256 | 0.209238  | 0.927704  | 0.755027  | 0.910633   | UP   |
| Os06g0218500 | <i>MCM9</i>     | 47.369592 | 35.3527   | 41.261548 | 15.318303 | 17.124616 | 22.4784187 | Down |
| Os01g0187600 | <i>CKX1</i>     | 4.492E-08 | 1.04E-07  | 2.264E-07 | 0         | 3.696E-06 | 1.9379E-06 | UP   |
| Os01g0197700 | <i>CKX2</i>     | 2.1193928 | 1.1429244 | 2.206198  | 0.877493  | 6.304451  | 8.865285   | UP   |
| Os10g0483500 | <i>CKX3</i>     | 1.30555   | 4.16786   | 2.37629   | 0.726817  | 1.79703   | 2.12029    | Down |
| Os01g0940000 | <i>CKX4</i>     | 0.171437  | 0.964282  | 5.05166   | 0.181841  | 2.54252   | 2.89854    | Down |
| Os01g0775400 | <i>CKX5</i>     | 46.86182  | 123.15212 | 177.37544 | 39.918353 | 145.53605 | 264.940373 | UP   |
| Os02g0220000 | <i>CKX6</i>     | 0.0290752 | 0.0324881 | 0.0442432 | 0         | 0.0518037 | 0          | Down |
| Os02g0220100 | <i>CKX7</i>     | 0         | 0         | 0.0395814 | 0         | 0         | 0          | -    |
| Os04g0523500 | <i>CKX8</i>     | 0.4936    | 1.1345    | 0.917514  | 0.14001   | 0.248557  | 0.180935   | Down |
| Os05g0374200 | <i>CKX9</i>     | 0.470852  | 0.325531  | 0.728189  | 1.52635   | 1.01976   | 0.46852    | UP   |
| Os06g0572300 | <i>CKX10</i>    | 0.4820175 | 1.337232  | 0.948062  | 0.0684505 | 0.4359357 | 0.56886031 | Down |
| Os08g0460600 | <i>CKX11</i>    | 0.540223  | 0.484106  | 0.94882   | 0.983701  | 9.527E-05 | 0.854041   | Down |

Note: T1, T2 and T3 samples represented for NIL-*IgsI*<sup>Samba</sup>, T4, T5 and T6 samples represented for NIL-*LGSJ*<sup>JF178</sup>.

**Table S6** RNA-seq analysis of unknown "cell cycle", "expansin" and "extensin" gene in NILs

| Function   | Gene ID      | T01_FPKM  | T02_FPKM  | T03_FPKM  | T04_FPKM  | T05_FPKM  | T06_FPKM  | log2FC     | Regulated |
|------------|--------------|-----------|-----------|-----------|-----------|-----------|-----------|------------|-----------|
|            | Os01g0920700 | 2.25606   | 2.25551   | 2.85636   | 8.89826   | 9.48155   | 7.0781    | 2.37451983 | Up        |
|            | Os03g0640825 | 4.21697   | 7.73593   | 12.2354   | 23.0587   | 45.1788   | 33.9485   | 1.87400657 | Up        |
|            | Os06g0113800 | 3.43711   | 1.5932    | 5.86967   | 0.175142  | 0         | 0.171242  | -4.8503951 | Down      |
|            | Os12g0634000 | 9.35327   | 6.72518   | 6.40215   | 0.754831  | 0.20617   | 2.67694   | -2.8820388 | Down      |
|            | Os10g0521801 | 9.80441   | 8.72845   | 15.6002   | 97.6589   | 83.1962   | 56.6161   | 1.9304179  | Up        |
|            | Os02g0125400 | 23.99847  | 17.06456  | 20.7726   | 0.748174  | 0.8576127 | 2.5670952 | -3.331871  | Down      |
|            | Os07g0551501 | 13.5201   | 12.5546   | 8.25259   | 3.22626   | 3.66955   | 2.88392   | -1.7078507 | Down      |
|            | Os03g0719000 | 6.666269  | 9.617035  | 9.16373   | 0.088297  | 0.7575065 | 0.572876  | -3.6383085 | Down      |
|            | Os08g0116566 | 3.2799986 | 4.0353274 | 4.4038935 | 8.0615167 | 6.3655351 | 5.2129369 | 1.20044808 | Up        |
|            | Os09g0459900 | 52.684679 | 47.109686 | 54.991583 | 8.899656  | 8.782239  | 14.303581 | -2.0409845 | Down      |
|            | Os09g0307300 | 1.811381  | 6.7383786 | 10.433782 | 0         | 0.0812881 | 0         | -8.3867211 | Down      |
|            | Os09g0273800 | 3.94607   | 3.1103    | 3.93098   | 0         | 0.267525  | 0.497482  | -3.85791   | Down      |
| Cell cycle | Os03g0665950 | 0.0157663 | 0.007901  | 2.1253801 | 21.057322 | 11.136601 | 17.409846 | 4.93930318 | Up        |
|            | Os03g0167600 | 8.32485   | 10.0086   | 23.0045   | 0.154432  | 0.133356  | 0.154119  | -6.6543923 | Down      |
|            | Os10g0480350 | 0.480414  | 0.772665  | 2.18025   | 4.5892    | 9.17272   | 9.01897   | 2.08938281 | Up        |
|            | Os12g0615600 | 0.0433539 | 0.141901  | 0.29228   | 2.05214   | 1.38763   | 0.965325  | 2.64734247 | Up        |
|            | Os03g0713500 | 6.18205   | 11.7202   | 9.10198   | 19.8336   | 19.6488   | 19.56     | 2.03127735 | Up        |
|            | Os01g0167900 | 17.251063 | 11.686006 | 12.301951 | 6.6686862 | 7.4584788 | 6.761086  | -1.4793571 | Down      |
|            | Os12g0105975 | 0.8465063 | 0.5104619 | 1.4301305 | 10.868404 | 11.356603 | 6.671382  | 2.80470145 | Up        |
|            | Os08g0298700 | 0.819396  | 0.764717  | 1.1337    | 0.0389301 | 0.128216  | 0.11805   | -3.6748214 | Down      |
|            | Os04g0499500 | 0.221274  | 0.522698  | 1.03434   | 2.99719   | 4.51513   | 2.81746   | 1.90579059 | Up        |
|            | Os03g0167650 | 3.73251   | 6.81806   | 13.2603   | 0.0545571 | 0.468032  | 0.322636  | -5.0670643 | Down      |
|            | Os09g0314500 | 0.672159  | 0.282378  | 0.49372   | 0.222343  | 0         | 0         | -3.5519682 | Down      |
|            | Os10g0147250 | 9.06E-07  | 7.30E-14  | 1.31E-15  | 0.762869  | 1.07017   | 0.588281  | Inf        | Up        |
|            | Os02g0601100 | 8.37985   | 11.1338   | 8.69205   | 9.76E-05  | 0.0005414 | 2.84E-05  | Inf        | Down      |
|            | Os10g0439200 | 3.79367   | 1.67414   | 2.25363   | 0.249234  | 0.0774923 | 0.136331  | -3.4740528 | Down      |
|            | Os02g0639500 | 134.45222 | 95.344104 | 90.748293 | 10.253262 | 19.302103 | 44.321208 | -2.0513102 | Down      |
| Expansin   | Os10g0556000 | 137.261   | 221.774   | 205.224   | 10.8138   | 50.2583   | 67.5594   | -2.0645564 | Down      |
|            | Os10g0555900 | 78.8804   | 94.996885 | 101.34074 | 2.53419   | 16.9463   | 16.401752 | -2.8902852 | Down      |
|            | Os06g0621950 | 82.7678   | 81.8096   | 64.8641   | 10.6359   | 26.5397   | 25.5481   | -1.5430308 | Down      |
|            | Os01g0186900 | 38.2462   | 33.8913   | 17.335402 | 115.112   | 174.906   | 62.452602 | 2.65530865 | Up        |
|            | Os07g0551501 | 13.5201   | 12.5546   | 8.25259   | 3.22626   | 3.66955   | 2.88392   | -1.7078507 | Down      |
|            | Os06g0698600 | 9.69775   | 11.8005   | 10.1678   | 41.0173   | 53.1596   | 28.3848   | 1.72102787 | Up        |
|            | Os10g0148700 | 76.0813   | 55.2939   | 38.413    | 0.851679  | 0.569882  | 1.8429    | -4.96014   | Down      |
|            | Os09g0535900 | 85.632815 | 65.515443 | 52.8244   | 8.2325261 | 16.010057 | 9.2997797 | -1.6147893 | Down      |
| Extensin   | Os05g0455250 | 6.88812   | 6.48701   | 6.46841   | 19.3563   | 22.8687   | 17.6751   | 1.30002088 | Up        |
|            | Os01g0217000 | 5.28307   | 4.951955  | 5.4981    | 0.3689161 | 0.801478  | 1.808826  | -2.0370009 | Down      |
|            | Os05g0570200 | 5.62289   | 2.76673   | 3.72477   | 0.79764   | 0         | 1.57504   | -2.3918173 | Down      |
|            | Os02g0100250 | 2.41244   | 2.64758   | 3.82526   | 11.7669   | 11.6009   | 8.07774   | 1.84386415 | Up        |
|            | Os08g0551200 | 5.09973   | 6.69423   | 10.3866   | 22.9911   | 27.8821   | 24.9753   | 1.50831046 | Up        |
|            | Os03g0637600 | 1.53524   | 2.86431   | 3.34396   | 0.150239  | 0.228036  | 0.0709608 | -3.8538469 | Down      |

|              |           |           |           |           |           |           |            |      |
|--------------|-----------|-----------|-----------|-----------|-----------|-----------|------------|------|
| Os06g0704450 | 10.686834 | 9.1961594 | 6.342198  | 20.350411 | 23.49907  | 12.968174 | 1.6341331  | Up   |
| Os03g0651950 | 50.7591   | 77.3116   | 26.9067   | 83.2642   | 75.2518   | 61.6134   | 1.26979113 | Up   |
| Os12g0599700 | 95.5135   | 66.9053   | 51.8455   | 17.3037   | 17.0685   | 20.5129   | -1.673801  | Down |
| Os03g0291200 | 24.3263   | 33.3901   | 24.9036   | 0.15492   | 1.18713   | 1.39511   | -4.4237509 | Down |
| Os11g0650500 | 3.50295   | 3.72351   | 6.61184   | 0.0796331 | 0.20436   | 0.225419  | -4.151144  | Down |
| Os03g0201901 | 1.8337185 | 2.0351222 | 2.316246  | 0.0966391 | 0.138885  | 0.2603634 | -3.0681284 | Down |
| Os04g0528200 | 257.992   | 88.4502   | 116.063   | 14.4823   | 0.712796  | 14.0461   | -3.6074336 | Down |
| Os03g0692700 | 415.50368 | 381.44699 | 403.54916 | 144.62918 | 135.70324 | 161.77203 | -1.3092373 | Down |

---

Note: T1, T2 and T3 samples represented for NIL-*lgsI*<sup>Samba</sup>; T4, T5 and T6 samples represented for NIL-*LGS1*<sup>JF178</sup>.

**Table S7** Alignment site of miR396 target in *OsGRF4*

| miRNA name  | miRNA sequences              | Target Acc.      | Expectation (E) | Target Accessibility (UPE) | Alignment sequence                                         | Inhibition |
|-------------|------------------------------|------------------|-----------------|----------------------------|------------------------------------------------------------|------------|
| osa-MIR396a | 11-uuccacagcuuucuugaacug-31  | LOC_Os02g47280.1 | 2.0             | 27.254                     | GUCAAGUUCUUUCG-ACACCUU<br>CCGU <b>UCA</b> AAGAAAGCCUGUGGAA | Cleavage   |
| osa-MIR396b | 11-uuccacagcuuucuugaacug-31  | LOC_Os02g47280.1 | 2.0             | 27.254                     | GUCAAGUUCUUUCG-ACACCUU<br>CCGU <b>UCA</b> AAGAAAGCCUGUGGAA | Cleavage   |
| osa-MIR396c | 11-uuccacagcuuucuugaacuu-31  | LOC_Os02g47280.1 | 2.0             | 27.254                     | CAAGUUCUUUCG-ACACCUU<br>GU <b>UCA</b> AAGAAAGCCUGUGGAA     | Cleavage   |
| osa-MIR396d | 91-uccacagcuuucuugaacgg-111  | LOC_Os02g47280.1 | 0.0             | 24.559                     | GGCAAGUUCUUUCGGACACCU<br>CCGU <b>UCA</b> AAGAAAGCCUGUGGA   | Cleavage   |
| osa-MIR396e | 13-uccacagcuuucuugaacug-33   | LOC_Os02g47280.1 | 1.0             | 24.559                     | GUCAAGUUCUUUCGGACACCU<br>CCGU <b>UCA</b> AAGAAAGCCUGUGGA   | Cleavage   |
| osa-MIR396f | 8-ucuccacagcuuucuugaacu-29   | LOC_Os02g47280.1 | 1.5             | 27.489                     | CAAGUUCUUUCGGACACCUCU<br>GU <b>UCA</b> AAGAAAGCCUGUGGAAA   | Cleavage   |
| osa-MIR396g | 151-uccacagcuuucuugaacgg-171 | LOC_Os02g47280.1 | 0.0             | 24.559                     | GGCAAGUUCUUUCGGACACCU<br>CCGU <b>UCA</b> AAGAAAGCCUGUGGA   | Cleavage   |
| osa-MIR396h | 111-uccacagcuuucuugaacgg-131 | LOC_Os02g47280.1 | 0.0             | 24.559                     | GGCAAGUUCUUUCGGACACCU<br>CCGU <b>UCA</b> AAGAAAGCCUGUGGA   | Cleavage   |
| osa-MIR396i | 91-uccacagcuuucuugaacgg-111  | LOC_Os02g47280.1 | 0.0             | 24.559                     | GGCAAGUUCUUUCGGACACCU<br>CCGU <b>UCA</b> AAGAAAGCCUGUGGA   | Cleavage   |

Note: The nine miR396 precursor and alignment site of *OsGRF4* were predicted by website on MIRBase (<http://www.mirbase.org/>) and psRNA Target (<http://plantgrn.noble.org/psRNATarget/>). Target Acc., Target accessions. Expectation (E), score the complementarity between miRNA and their target transcript. Target Accessibility (UPE), maximum energy to unpair the target site (UPE). Alignment sequence, mature miRNA (upper, 3'-5') and alignment target site (down, 5'-3'). Red bold letters indicate mutation position of *LGS1*.
